# Supplementary material
Source: publisher figshare collection journal article supplement (https://tandf.figshare.com/ndownloader/files/21488721)
Supplement: Supplementary file 1 [file 21488721]

Appendix: Data availability for different sample sub-groups

Figure A1: Sample of hospital admitted drivers 2008-2010 by availability of alcohol and drug test results.

Figure A2: Sample of hospital admitted motorcyclists 2008-2010 by availability of alcohol and drug test results.

Figure A3: Sample of hospital admitted drivers 2014-2017 by availability of alcohol and drug test results.

Figure A4: Sample of hospital admitted motorcyclists 2014-2017 by availability of alcohol and drug test results.
